# "SUDS-lineales" para reducir el riesgo de inundación considerando escenarios de Cambio Climático

## "SUDS-linear" to reduce flood risk considering Climate Change scenarios

Gonzalo Olivares-Cerpa <sup>1a1\*</sup>, Beniamino Russo <sup>1b1,c</sup>, Montse Martínez-Puentes <sup>1b2</sup>, Ernest Bladé <sup>1a2</sup> y Marcos Sanz-Ramos <sup>1a3</sup>

<sup>1a</sup>Institut Flumen, Universitat Politècnica de Catalunya – Centre Internacional de Mètodes Numèrics en Enginyeria. C/Gran Capità S/N, 08034 Barcelona, España.

<sup>1b</sup>AQUATEC. Paseo de la Zona Franca, 46-48, 08038, Barcelona, España.

<sup>1c</sup>Grupo de Ingeniería Hidráulica y Ambiental (GIHA), Escuela Universitaria Politécnica de La Almunia (EUPLA), Universidad de Zaragoza. Calle Mayor 5, 50100, La Almunia de Doña Godina, Zaragoza, España.

E-mail: <sup>1a1</sup>gonzalo.olivares@upc.edu; <sup>1a2</sup>ernest.blade@upc.edu; <sup>1a3</sup>marcos.sanz-ramos@upc.edu; <sup>1b1</sup>brusso@aquatec.es; <sup>1b2</sup>mmartinezp@aquatec.es; <sup>1b3</sup>brusso@unizar.es

\*Autor para correspondencia

Recibido: 21/01/2022

Aceptado: 25/03/2022

Publicado: 30/04/2022

**Citar como:** Olivares-Cerpa, G., Russo, B., Martínez-Puentes, M., Bladé, E., Sanz-Ramos, M. 2022. "SUDS-linear" to reduce flood risk considering Climate Change scenarios. *Ingeniería del agua*, 26(2), 77-90. <https://doi.org/10.4995/ia.2022.17058>

## RESUMEN

Los Sistemas Urbanos de Drenaje Sostenible (SUDS) suponen una alternativa válida para dar solución a diversos problemas del drenaje urbano. Su aplicación, generalmente de carácter puntual, es limitada y puede no ser efectiva para dar solución al previsible incremento de las intensidades máximas de precipitación asociadas al Cambio Climático. El presente estudio analiza, en situación actual y con proyecciones del Cambio Climático, los potenciales beneficios de aplicar pavimento permeable en carriles bici, convirtiéndose en elementos de captación lineal, continua y difusa ("SUDS-lineales"). Mediante el uso de un modelo numérico hidráulico-hidrológico acoplado que incorpora la capacidad de infiltración de un pavimento permeable, y tomando como ejemplo dos zonas de la ciudad de Barcelona con distinta peligrosidad por inundaciones pluviales, se evaluó el comportamiento global de los SUDS-lineales considerando escenarios de precipitación actual y los potenciales efectos del Cambio Climático. Los resultados numéricos mostraron una reducción potencial del 90% de la escorrentía.

**Palabras clave** | pavimento permeable, carril bici, emergencia climática, modelización numérica.

## ABSTRACT

*Sustainable Urban Drainage Systems (SUDS) are a valid alternative to solve several urban drainage problems. Its application, generally isolated, is limited and may not be effective in solving the foreseeable increase in maximum precipitation intensities associated with Climate Change. This study analyzes, in the current situation and with projections of Climate Change, the potential benefits of applying permeable pavement in bike lanes, turning them into linear, continuous and diffuse drainage elements ("SUDS-linear"). Using a coupled hydraulic-hydrological numerical model that incorporates the infiltration capacity of a permeable pavement, and analyzing two areas of the city of Barcelona with different hazard due to pluvial flooding, the global behavior of this kind of linear SUDS was evaluated considering current precipitation scenarios and the potential effects of Climate Change. The numerical results showed a potential reduction of 90% in runoff.*

**Key words** | permeable pavement, bike line, climate emergency, numerical modelling.

## INTRODUCCIÓN

El continuo y rápido crecimiento de las ciudades, así como el potencial incremento en la intensidad máxima de las precipitaciones por efecto del Cambio Climático (Lastra et al., 2015; Rodríguez et al., 2014; Russo et al., 2019), supone unos de los retos de mayor trascendencia para el drenaje urbano. Técnicas como los Sistemas Urbanos de Drenaje Sostenible (SUDS) constituyen una alternativa válida a las soluciones tradicionalmente empleadas para hacer frente a los desafíos mencionados aportando, además, beneficios a nivel ambiental, social, estético, energético y económico (Jiménez et al., 2021; Locatelli et al., 2020). Asimismo, los SUDS pueden contribuir a mejorar la resiliencia de los sistemas de drenaje urbano frente a las inundaciones pluviales, ya que actualmente pueden verse superados por precipitaciones de alta probabilidad de ocurrencia (Anta-Álvarez et al., 2015).

Dentro de los SUDS, los pavimentos permeables representan los sistemas más comunes en el mundo, habiéndose implementado bajo todo tipo de condiciones climáticas (Castro-Fresno et al., 2013; Nnadi et al., 2014) y con el soporte de una amplia investigación desde principios del siglo XXI. Según Jato-Espino et al. (2019), el 17.1 % del total de publicaciones sobre Infraestructura Verde de Aguas Pluviales tiene como objeto los pavimentos permeables, lo que muestra claramente su relevancia dentro de la amplia gama de técnicas SUDS disponibles.

Al margen de esta gran difusión y aplicabilidad de los pavimentos permeables, tanto en calzadas como en aceras y superficies de aparcamientos, además de una literatura conocida de casos teóricos y experimentales en otras partes del planeta (Cheng et al., 2019; Craig y Zheng, 2022; West et al., 2016; Dai et al., 2020), en España, resulta poco estudiado la aplicación de pavimentos permeables en carriles bici. Uno de los pocos ejemplos encontrados es el carril bici de la calle Doctor Manuel Candela (Valencia), donde se han incluido pavimentos permeables en varios tramos de su trazado (de la Fuente et al., 2021).

En la ciudad de Barcelona, así como en otras grandes urbes de España y de Europa, los carriles bici han experimentado un gran impulso en las últimas dos décadas. En particular, el Ayuntamiento de Barcelona tiene como objetivo llegar a los 308 km de carril bici en los próximos años, lo que supone un incremento del 165 % con respecto a 2015, cuya trama se extendía a 116 km. En este marco, próximamente se prevé efectuar cerca de 130 actuaciones para conseguir el despliegue total de la red de carriles bici.

La posibilidad de contar con muchos kilómetros de carriles bici permeables podría aliviar el sistema de drenaje de la ciudad durante episodios de lluvia intensa y moderada atenuando, de manera difusa (prácticamente en todas las cuencas urbanas), los hidrogramas de escorrentía antes de que éstos lleguen a la red de alcantarillado. Además, desde un punto de vista ambiental, este efecto de atenuación reduciría también las descargas del sistema de saneamiento (DSS) a los medios receptores de la ciudad, mejorando su calidad y estado ecológico.

En este sentido, los SUDS tienen un papel relevante en la ciudad de Barcelona, tal y como queda reflejado en el nuevo Plan Director Integral de Saneamiento de Barcelona. En este documento se proponen diferentes técnicas SUDS (tejados verdes, zanjas de infiltración, zonas de bioretención, balsas de cabeceras, etc.) como actuaciones complementarias a las medidas convencionales de tipo estructural (Ortiz et al., 2020).

Este documento analiza los potenciales beneficios en términos de reducción de la escorrentía superficial derivados de la aplicación de pavimentos permeables en carriles bici, convirtiéndose así en *SUDS-lineales*. Para ello, en el marco del proyecto "Evaluación de SUDS-lineales para reducir el riesgo de inundación con horizontes de Cambio Climático", se analizaron las diferentes alternativas técnicas sobre la aplicación y capacidad hidráulica de pavimentos permeables. Se puso a punto un modelo numérico hidráulico-hidrológico acoplado que incorpora la capacidad de infiltración de un pavimento permeable tipo y, tomando como ejemplo dos zonas de la ciudad de Barcelona con distinta peligrosidad por inundaciones pluviales, se evaluó el comportamiento global de los *SUDS-lineales* bajo escenarios de precipitación actual y considerando los efectos del Cambio Climático. Los resultados numéricos muestran una reducción potencial del 90 % de la escorrentía superficial.

## MATERIALES Y MÉTODOS

### Pavimentos permeables

Según la definición de las “Guías de adaptación al riesgo de inundación: sistemas urbanos de drenaje sostenible” del Ministerio Español para la Transición Ecológica, los pavimentos permeables son aquellos que dejan pasar el agua, permitiendo la transmisión directa del agua al terreno o su acumulación para posterior reutilización (Núñez-Collado et al., 2019).

Los pavimentos permeables se pueden clasificar de diferentes formas, sin embargo, las dos opciones más utilizadas son los que se refieren al tipo pavimento y el destino final del agua que se infiltra por los mismos (diseño de la capa drenante). Uniendo ambos criterios, los firmes permeables se clasifican en quince posibles tipologías, como resultado de combinar los cinco tipos de pavimentos permeables con las tres opciones de gestión del agua consideradas. La clasificación y descripción de los pavimentos se resume en la Tabla 1.

**Tabla 1** | Clasificación y descripción de los pavimentos permeables.

| Tipo                                   | Descripción                                                                                                                                                                                                                                                                                                                                                                                                             |
|----------------------------------------|-------------------------------------------------------------------------------------------------------------------------------------------------------------------------------------------------------------------------------------------------------------------------------------------------------------------------------------------------------------------------------------------------------------------------|
|                                        | Tipologías de pavimento                                                                                                                                                                                                                                                                                                                                                                                                 |
| Césped poroso o gravilla con refuerzos | Pavimento poroso en <i>hormigón</i> : formado por retículas rejillas o casillas con huecos ocupados por césped o grava. Pavimento poroso en <i>plástico</i> que tiene la misma estructura que el anterior, pero en plástico. Ambos se utilizan comúnmente en aparcamientos, escuelas, vías privadas, etc.                                                                                                               |
| Adoquines con ranuras                  | Pavimentos formados por <i>adoquines</i> de hormigón dispuestos de forma separada (canales de separación) para permitir la infiltración vertical del agua. Las ranuras de separación pueden ser o no rellenadas con material drenante (grava o césped). En el caso de que se rellene el espacio entre adoquines, este tiende a ser mayor que en la situación sin relleno. Se utilizan principalmente en vías urbanas.   |
| Mezclas bituminosas porosas            | Pavimento drenante altamente utilizado que permiten la infiltración del agua superficial. Según el porcentaje de poros se pueden agrupar en densas, semidensas y porosas (Gordillo, 2001). Según el tipo de mezcla se pueden clasificar en convencionales y modificados (Del Val-Melús, 1990).                                                                                                                          |
| Hormigón poroso                        | Similar a la mezcla bituminosa, es un pavimento hecho a partir de hormigón con porosidades entre un 15 y un 25%. Dos tipos conocidos: el hormigón <i>hidráulico</i> que se hace a partir de un conglomerado de áridos y el <i> sintético</i> fabricado con ligante sintético a base de resinas encargadas de ligar el esqueleto mineral adecuadamente. Se usa generalmente en canchas de pádel o con fines decorativos. |
| Pavimento permeable cerámico           | Desarrollado en España en el marco del proyecto LIFE CERDUS ( <i>Ceramic Sustainable Urban Drainage System</i> ), consiste en el uso de baldosas de cerámica de bajo valor comercial con un sistema filtrante de pavimentación. El piloto de este proyecto de investigación fue un tramo de calle de tránsito ligero y de peatones en un entorno urbano consolidado de aproximadamente 3000 m <sup>2</sup> .            |
|                                        | Tipo de capa drenante                                                                                                                                                                                                                                                                                                                                                                                                   |
| Infiltración completa                  | El agua infiltra por cada una de las capas drenante del pavimento, incluyendo la superficie. Tiene como objetivo principal la posibilidad de recarga de las aguas subterráneas y al mismo tiempo mejora en la calidad de la misma por la acción de filtración del mismo pavimento.                                                                                                                                      |
| Infiltración con almacenamiento        | Diseñados y construidos para permitir el almacenaje de un determinado volumen de agua en la sub-base. Esta agua puede ser posteriormente utilizada para usos no potables. Pueden ser utilizados en vías con una carga contaminante relativamente baja.                                                                                                                                                                  |
| Infiltración con drenaje diferido      | Constan de un sistema de drenaje subterráneo formado por cañerías permeables que tienen por objetivo retardar el flujo de aguas pluviales, laminando las puntas de caudal de los sistemas de saneamiento a los cuales están conectadas. Está agua es posteriormente tratada por los sistemas de saneamiento.                                                                                                            |

### Horizontes de Cambio Climático

El clima de la ciudad de Barcelona es típicamente mediterráneo, caracterizado por un régimen de precipitaciones irregular (Llasat y Rodríguez, 1992; Martín-Vide, 1994). La distribución temporal de la precipitación consta de dos períodos lluviosos marcados: uno en la primavera, y otro a finales del verano y principios del otoño. La cantidad de precipitación oscila entre 540 y 600 mm, aunque presenta una elevada variabilidad anual, ya que algunos años se pueden superar los 1000 mm o no alcanzar los 400 mm.

Otra característica destacable de este tipo de clima es la distribución temporal de la precipitación, con una concentración de días de lluvia que va de 80 a 100 días al año, de los cuales sólo unos pocos son de carácter extraordinario. Esto quiere decir que gran parte de la precipitación se acumula en pocos eventos de lluvia, pero de alta intensidad, que provienen de lluvias con carácter convectivo. Normalmente estos eventos se producen entre los meses de julio y noviembre, causando en múltiples ocasiones que la capacidad del sistema de drenaje se vea superada (Russo et al., 2019).

En España es común trabajar con las curvas IDF, ya que permite asociar una probabilidad de ocurrencia al evento de precipitación. Sin embargo, es necesario trabajar con una alta resolución espacial y temporales de datos pluviométricos al fin de contar con IDF fiables.

Los primeros estudios para la obtención de IDF específicas para la ciudad de Barcelona se realizaron a partir de los datos de intensidad de lluvia obtenidos del pluviógrafo del Jardí del Observatori Fabra (Redaño et al., 1986; Vázquez et al., 1987). En 2010 se amplió el estudio incluyendo datos de un nuevo pluviómetro de intensidad de tipo balancín ubicado en la terraza del edificio de la Facultad de Física de la Universitat de Barcelona. La serie de datos abarcaba desde el 1995 al 2009, de manera que la serie total, considerando los datos del Jardí (66 años), alcanzaría un total de 81 años. Con esta información se calcularon las intensidades máximas de lluvia en intervalos de tiempo de 5 a 120 min (con incrementos cada 5 minutos), lo que permitió obtener el período de retorno correspondiente a cada intensidad máxima en función de su duración (Rodríguez et al., 2014).

Hasta el año 2020 los estudios pluviométricos en el campo del drenaje urbano en Barcelona se desarrollaron considerando siempre los datos del Jardí del Observatori Fabra. En el marco del nuevo Plan Director Integral de Saneamiento de la ciudad de Barcelona (PISBA), se llevó a cabo un nuevo estudio para actualizar las IDF de la ciudad. Se analizaron los datos disponibles a fin de comprobar las posibles diferencias entre los patrones de lluvia asociados a las máximas precipitaciones en diferentes zonas de la ciudad. A raíz de este nuevo estudio, se obtuvieron IDF empíricas hasta un período de retorno de 10 años. Para los períodos de retorno de 20, 25, 30, 50, 75, 100 y 500 años, las IDF se obtuvieron a través de la extrapolación de parámetros utilizando la distribución de probabilidad de extremos de Gumbel tipo I (Ortiz et al., 2020).

Las curvas IDF, que son comúnmente utilizadas para el diseño de estructuras en el campo de la ingeniería hidráulica e hidrológica, pueden ser también una herramienta útil de análisis para el estudio de fenómenos de lluvia extrema incorporando los posibles efectos del Cambio Climático.

Según el último reporte del Panel Intergubernamental de Cambio Climático (IPCC, 2021), y de acuerdo con anteriores informes (IPCC, 2014), las proyecciones climáticas asociadas a precipitaciones extremas indican un incremento de fenómenos extremos para latitudes medias del globo, siendo las más afectadas las zonas más húmedas. Se espera que, en algunas partes del planeta, la frecuencia, intensidad y/o cantidad precipitaciones intensas vaya en aumento. Sin embargo, debido a la alta incertidumbre de dichas proyecciones, se aconsejan estudios detallados a nivel local (Ministerio de Agricultura, Alimentación y Medio Ambiente, 2016; Lehner et al., 2006). Aunque estudios locales realizados por algunas entidades concluyen que la lluvia total anual en la península Ibérica en las últimas tres décadas ha disminuido significativamente en comparación con los años 60 y 70 del s. XX (Pérez et al., 2010), algunas proyecciones regionales presentan incrementos probables de precipitación torrencial con episodios más cortos e intensos (Christensen y Christensen, 2004).

Barcelona no está exenta a dichos cambios futuros, por ende, estudiar y entender este tipo de fenómenos es importante para una gestión adecuada del ciclo hidrológico en su entorno urbano. Los efectos del Cambio Climático, con el posible incremento de fenómenos extremos de lluvia deben ser considerados con el fin de prevenir problemas futuros en los sistemas de drenaje. Las curvas IDF pueden ser alteradas por el supuesto aumento de lluvias intensas causadas por el Cambio Climático (Casas-Castillo et al., 2018). Una visión global de esta situación fue presentada por Willems et al. (2012).

Una forma de presentar los efectos del Cambio Climático en las lluvias de diseño, es a través de la definición de los llamados factores de Cambio Climático ( $C_p$ ). Estos se definen como (Ecuación 1) el cociente entre la intensidad de lluvia de período de retorno  $T$  y duración  $t$  correspondiente a un escenario de clima futuro y la intensidad de la lluvia ( $I$ ) equivalente en el clima actual (Arnbjerg-Nielsen, 2012). Los factores de cambio pueden ser directamente aplicados a las intensidades de la lluvia de diseño obteniendo un nuevo hietograma de lluvia para escenarios futuros de cambio.

$$c_f = \frac{I(t,T)_{\text{futuro}}}{I(t,T)_{\text{presente}}} \quad (1)$$

Los valores de este coeficiente para una amplia serie de duraciones y periodos de retorno, y que oscilan entre 1.07 y 1.26, fueron calculados con un horizonte temporal del año 2100 (Russo et al., 2019). Las variaciones mayores se producen para el período de retorno de 500 años (T500) y una duración de 15 minutos. Por el contrario, la menor variación se produce para los períodos de retorno T500 y T100 con una duración de 5 min. Estos valores representan el percentil 50 de los resultados obtenidos de 10 modelos de circulación atmosférica forzados por los escenarios de Cambio Climático RCP4.5 y RCP 8.5 con el fin de incluir la incertidumbre relacionada a la selección de los modelos (simulaciones) y los RCP seleccionados (Ortiz et al., 2020; Russo et al., 2019).

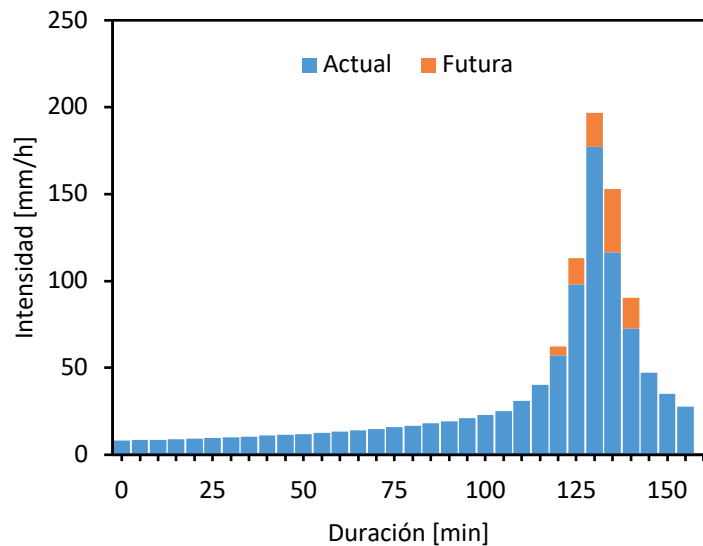

**Figura 1** | Comparación de la lluvia de diseño actual y futura considerando escenarios de Cambio Climático para un período de retorno de 10 años.

A partir del análisis de estos factores, se actualizaron las IDF y las lluvias de diseño futuras para los diferentes períodos de retorno. La Figura 1 muestra la lluvia de diseño para un período de retorno de 10 años calculada con datos de lluvia hasta el año 2018 y la proyección realizada para el horizonte 2071–2100 en función de los coeficientes de Cambio Climático previamente calculados (Ortiz et al., 2020; Russo et al., 2019). En color azul se representan las barras de la situación actual y en naranja los incrementos de intensidad relacionados con los coeficientes de Cambio Climático (incremento de un 17% en el volumen total). Estos hietogramas son los empleados en las simulaciones numéricas que se describen a continuación.

## Caso de estudio: Barcelona

Los potenciales beneficios de aplicar SUDS-lineales en base a pavimentos permeables se evaluaron en cuatro casos estudio de dos zonas específicas de la ciudad de Barcelona, seleccionadas en base a criterios de la peligrosidad por inundación pluvial (Figura 2). La Zona 1, de alta peligrosidad, presenta los casos de estudio de las calles Ronda Sant Pau y Parlament, en el barrio de Sant Antoni. La Zona 2, de baja peligrosidad, se sitúa en el barrio de Pedralbes, en las calles Gran Capità y Cavallers.

La selección de las calles se realizó en base a criterios de peligrosidad hidráulica, pendientes longitudinal y transversal de la calle, y la existencia de carril bici. La clasificación de la peligrosidad hidráulica de los dos tramos de calles se tomó de información previamente generada para la ciudad de Barcelona desarrollada en el marco del Pla Director Integral de Sanejament de la Ciutat de Barcelona (Russo et al., 2019).

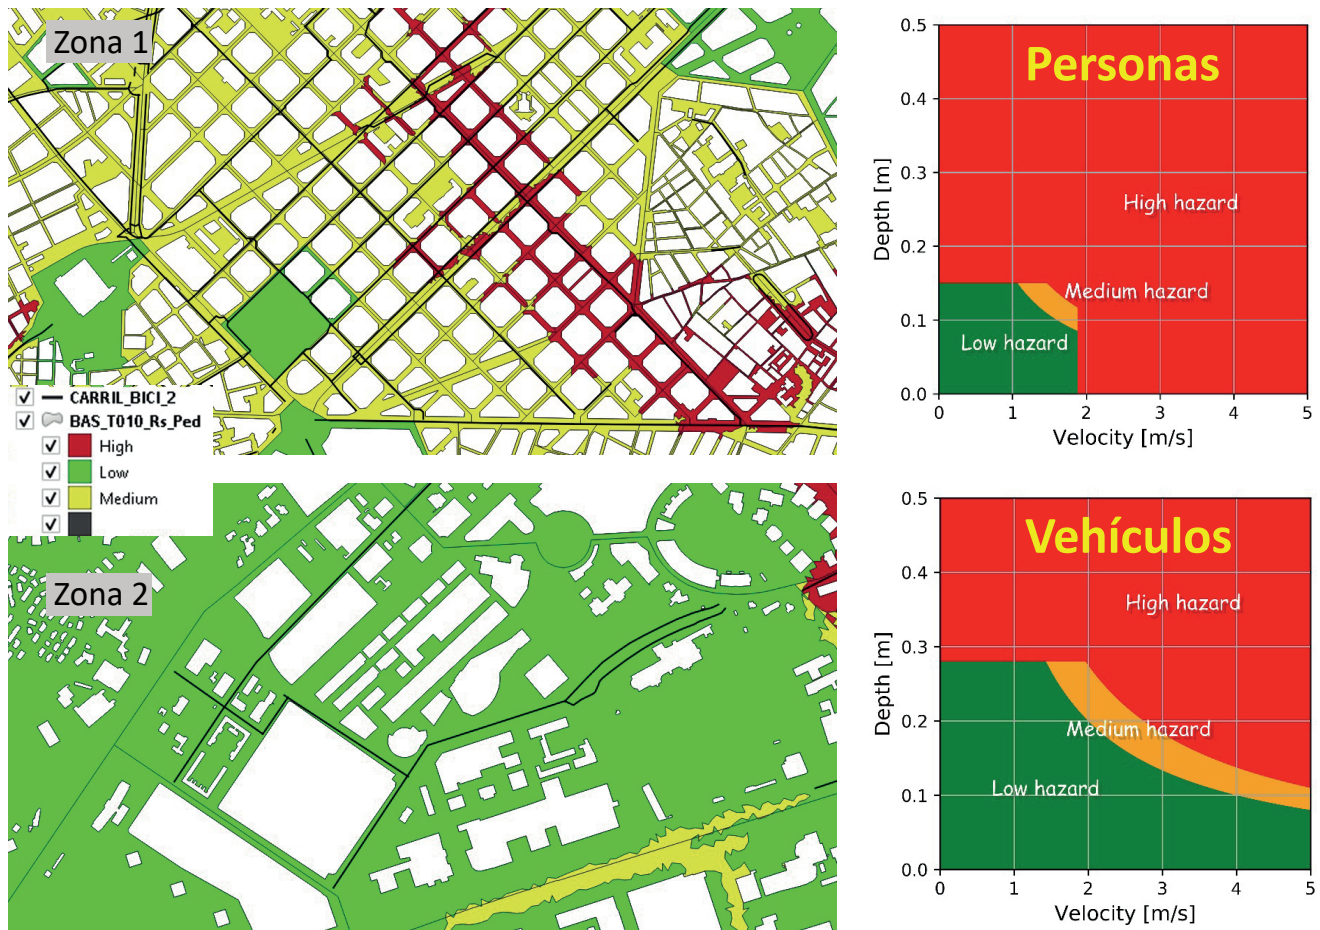

**Figura 2 |** Criterios de peligrosidad para personas y vehículos en función de las variables hidráulicas calado/velocidad y su distribución espacial (mapas) en el entorno urbano (zona 1 y zona 2) para un período de retorno de 10 años.

Uno de los productos principales fue la obtención de mapas de peligrosidad y riesgo para la circulación de personas y vehículos (estabilidad). La Figura 2 muestra el criterio de peligrosidad empleado para peatones, así como el resultado de su aplicación en dos ámbitos de la ciudad en base a criterios específicos asociados a los valores de calado y la velocidad en calles en situaciones de inundaciones pluviales urbanas.

Los mapas de peligrosidad representan los niveles de probabilidad de que una persona o vehículo pierda la estabilidad, pueda caer o ser arrastrado por el flujo del agua. Las zonas de peligrosidad alta indican aquellas zonas donde las variables hidrodinámicas (calado y velocidad del flujo) son capaces de causar inestabilidad para una persona en función de la magnitud del evento de inundación asociado a un período de retorno.

## Modelización numérica: discretización, configuración y escenarios de cálculo

Los procesos de transformación lluvia-escorrentía y propagación del flujo superficial se analizaron con la herramienta de modelización Iber (Bladé et al., 2014a,b). Este modelo resuelve las ecuaciones bidimensionales de flujo en lámina libre y, además, incorpora procesos hidrológicos (precipitación, infiltración, percolación, evaporación, flujo subsuperficial, etc.), lo que le confiere la capacidad de realizar modelización distribuida hidrológica-hidráulica de forma acoplada, tanto a nivel de cuenca (Cea y Bladé, 2015; Fraga et al., 2013, 2020, 2021; Sanz-Ramos et al., 2018, 2020a, 2021) como a nivel de ciudad o calzada (Sanz-Ramos et al., 2020c; Sañudo et al., 2020; Aranda et al., 2021).

Las dos zonas de estudio analizadas representan tramos o calles completas de la ciudad de Barcelona con características geométricas, dimensiones y niveles de riesgo diferentes (Russo et al., 2019; Ortiz et al., 2020). Estas incluyen las aceras y calzadas, pero no así la red de drenaje subterránea (alcantarillado). La discretización espacial se llevó a cabo mediante una malla con una densidad superior a 5000 elementos por hectárea (Tabla 2), un valor varios órdenes de magnitud superior al empleado habitualmente en estudio de inundabilidad fluvial (Sanz-Ramos et al., 2020b). Se utilizaron datos topográficos de máxima actualidad y resolución del Instituto Cartográfico y Geológico de Catalunya (Descàrregues): el modelo digital del terreno de 2x2 m de tamaño de celda. A pesar de que estos datos no proporcionan información suficiente para representar con detalle la geometría de las calles (p.ej. el bordillo entre la acera y la calzada), sí que permiten caracterizar las direcciones preferentes del flujo y, así, minimizar la dependencia de los resultados hidráulicos de la topografía (Casas Planes et al., 2005).

**Tabla 2 |** Escenarios de cálculo analizados; tipología y características de calles; discretización numérica.

| Situación <sup>(1)</sup> | Pavimento | Orientación respecto al flujo | Riesgo por inundación | Área (m <sup>2</sup> ) |       |      | Calle          | Pendiente <sup>(2)</sup> [%] | Els./ha |
|--------------------------|-----------|-------------------------------|-----------------------|------------------------|-------|------|----------------|------------------------------|---------|
|                          |           |                               |                       | Total                  | PP    | %    |                |                              |         |
| Actual                   | Sin PP    |                               |                       |                        |       |      |                |                              |         |
| Actual                   | Con PP    |                               | Bajo                  | 4.430                  | 584   | 13.2 | Gran Capità    | 5.9                          | 5.079   |
| PCC                      | Sin PP    |                               |                       |                        |       |      |                |                              |         |
| PCC                      | Con PP    |                               |                       |                        |       |      |                |                              |         |
| Actual                   | Sin PP    |                               |                       |                        |       |      |                |                              |         |
| Actual                   | Con PP    | ⊥                             | Bajo                  | 15.767                 | 2.355 | 14.9 | Cavallers      | 1.5-1.9 <sup>(3)</sup>       | 5.328   |
| PCC                      | Sin PP    |                               |                       |                        |       |      |                |                              |         |
| PCC                      | Con PP    |                               |                       |                        |       |      |                |                              |         |
| Actual                   | Sin PP    |                               |                       |                        |       |      |                |                              |         |
| Actual                   | Con PP    |                               | Alto                  | 36.673                 | 3.262 | 8.9  | Ronda Sant Pau | 0.7                          | 5.450   |
| PCC                      | Sin PP    |                               |                       |                        |       |      |                |                              |         |
| PCC                      | Con PP    |                               |                       |                        |       |      |                |                              |         |
| Actual                   | Sin PP    |                               |                       |                        |       |      |                |                              |         |
| Actual                   | Con PP    | ⊥                             | Alto                  | 10.899                 | 3.340 | 30.6 | Parlament      | 0.4                          | 5.341   |
| PCC                      | Sin PP    |                               |                       |                        |       |      |                |                              |         |
| PCC                      | Con PP    |                               |                       |                        |       |      |                |                              |         |
| Actual                   | Sin PP    |                               |                       |                        |       |      |                |                              |         |

<sup>(1)</sup>Precipitación T10 actual y considerando las Proyecciones del Cambio Climático (PPC).

<sup>(2)</sup>Pendiente media de la alineación principal de la calle.

<sup>(3)</sup>La calle vierte hacia el oeste y el este con pendientes medias de 1.5 y 1.9%, respectivamente.

Todo el dominio de estudio se consideró completamente impermeable, a excepción del carril bici, que actuaría como SUDS-lineal. En estas zonas se impuso una permeabilidad lineal con el calado asociada a la capacidad infiltración de un pavimento permeable (PP) con una porosidad del 23%. El modelo numérico se calibró y validó con datos experimentales de permeabilidad (Sanz-Ramos et al., 2022). Se utilizó una precipitación sintética por bloques alternados asociada a un período de retorno en todo el dominio (Ortiz et al., 2020), impidiendo el intercambio de caudal entre las calles colindantes a excepción de la parte más baja de cada tramo de estudio, que se consideró como contorno de salida. Esto permitió analizar el comportamiento hidrológico-hidráulico de forma aislada e independiente en función de los diferentes escenarios de cálculo.

Se analizaron 16 escenarios combinación de 2 hitos temporales para la precipitación (situación actual y considerando los efectos del Cambio Climático), 2 orientaciones de calles distintas (paralela [||] y perpendicular [⊥] a la dirección principal de drenaje) en 2 zonas de riesgo por inundación diferente (elevado y bajo) y para 2 situaciones diferentes, considerando o no pavimento permeable (Con y Sin PP, respectivamente). La Tabla 2 detalla las características de los escenarios analizados.

## RESULTADOS Y DISCUSIÓN

### Situación actual

Los resultados numéricos en situación actual muestran reducciones del caudal punta entre el 44 y el 92% cuando se aplica pavimento permeable en los carriles bici. Esta reducción es particularmente relevante (92%) para el caso de la calle Cavallers debido, principalmente, a que el carril bici se sitúa en la parte baja de la pendiente transversal de la calle. En este caso, el elemento SUDS está actuando como un interceptor de la escorrentía superficial, tanto longitudinal como transversal. Una situación similar se produce para Ronda de Sant Pau, con un 71% de reducción, y cuya pendiente transversal favorece la concentración de la parte del flujo en el lado oeste de la calle, donde se ubica carril bici (Figura 3a). La concentración del flujo, a banda y banda de la calle, permite apreciar el efecto de la doble pendiente transversal de la misma causando, previsiblemente, que el elemento SUDS no alcance valores más elevados de efectividad (Figura 3b). Por otro lado, la menor reducción de caudal superficial punta se da para la calle Gran Capità, con un 44%, debido a que su pendiente transversal tiende a acumular el flujo en el lado opuesto donde se ubica el carril bici (Figura 3c). La Figura 3d muestra un patrón e intensidad del flujo similar aun considerando pavimento permeable en el carril bici de la calle Gran Capità.

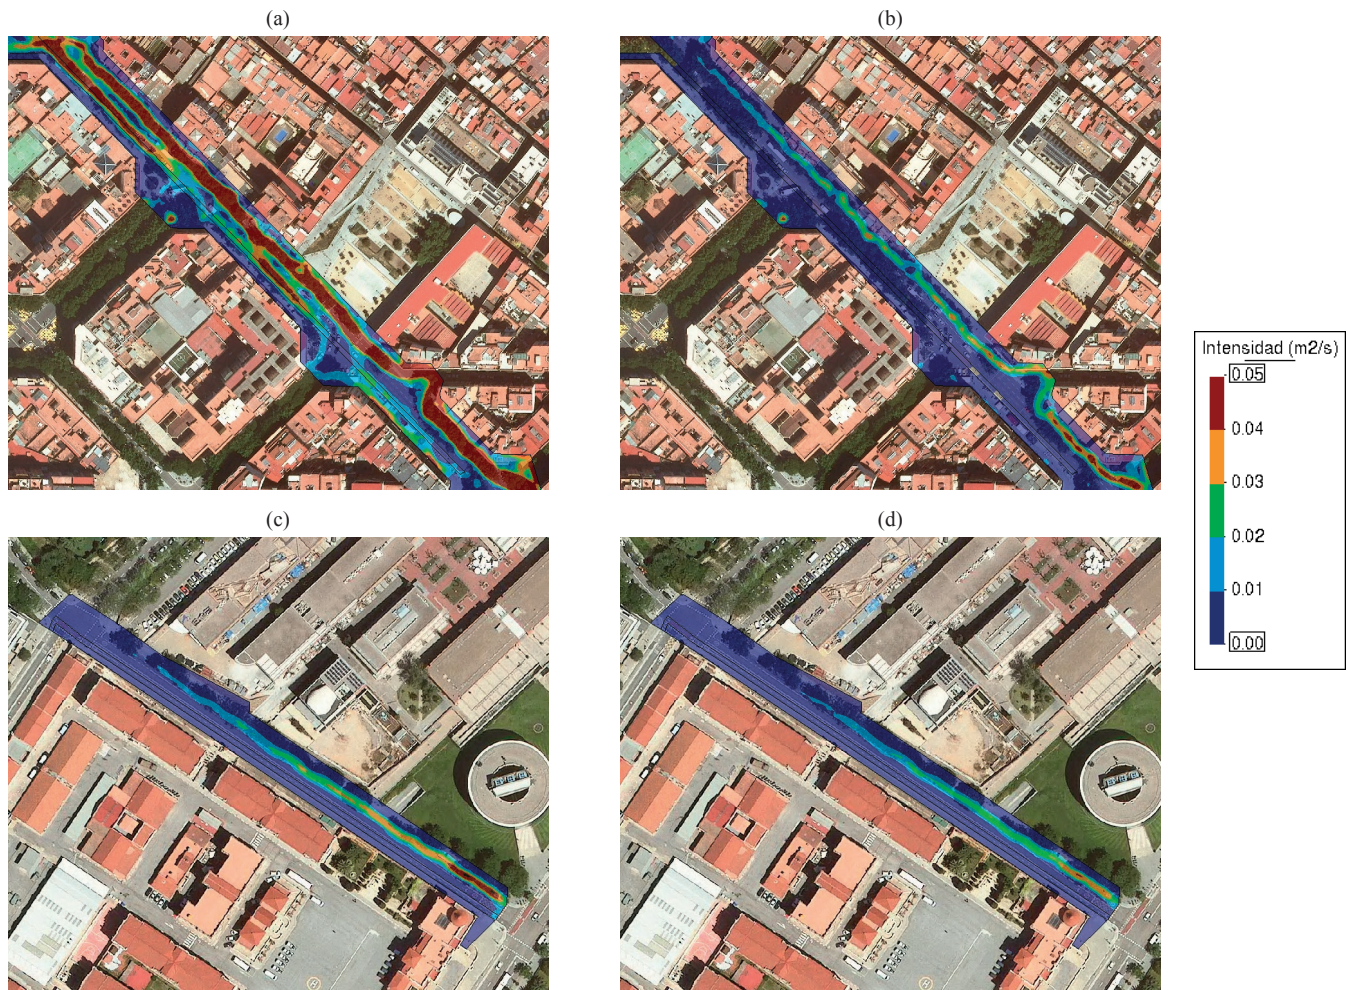

**Figura 3** | Mapa de máxima intensidad del flujo superficial (producto de la velocidad por el calado) para los tramos de estudio en situación actual: Ronda Sant Pau, en la parte baja, sin considerar pavimento permeable (a) y considerando pavimento permeable (b); calle Gran Capità, sin considerar pavimento permeable (c) y considerando pavimento permeable (d).



La eficacia de los elementos SUDS se ha evaluado como el cociente entre ratios área pavimento permeable/área total del analizada (Tabla 2) y caudal punta con/sin pavimento permeable. Las calles Cavallers y Parlament, con eficacias de 189.2 y 114.1 respectivamente, contrastan con las calles Gran Capità y Ronda Sant Pau, con eficacias de 23.5 y 31.2. De estos valores se deduce que las calles con orientación perpendicular a la dirección principal del drenaje son más eficaces que las que sí están orientadas con la dirección del drenaje. Esto pone de manifiesto que el uso de pavimento permeable como elemento interceptor transversal del flujo es, a priori, más eficaz que como elemento de captación longitudinal.

## Situación futura

La consideración de los efectos del Cambio Climático se traduce, en este caso, en un incremento de la intensidad de precipitación del 7 al 26% dependiendo de la duración de la intensidad asociada a los bloques del hietograma (Ortiz et al., 2020), lo que supone un aumento del 17% de la precipitación total para una lluvia de periodo de retorno de 10 años. Suponiendo que la geometría de las calles, y la capacidad de infiltración del pavimento permeable, se mantienen invariables, el incremento de caudal punta respecto a la situación actual, sin considerar pavimento permeable en los carriles bici, oscilaría entre el 10.9 y el 12.1% y, considerando pavimento permeable, entre el 10.1 y el 17.2%.

Los resultados numéricos muestran que no habría alteraciones significativas en los patrones del flujo respecto a la situación actual, pero sí reducciones significativas en su intensidad (Figura 3a y Figura 3b). En cambio, la eficacia de los elementos SUDS-lineales se incrementaría ligeramente en las calles con riesgo por inundación bajo (Gran Capità, 23.7; Cavallers, 189.8), mientras que se reduciría levemente en las calles con riesgo por inundación alto (Ronda Sant Pau, 29.8; Parlament, 114.0). Cabe destacar que la eficacia de los elementos SUDS en la calle Ronda Sant Pau bajaría 1.3 puntos debido a que, según el análisis hidráulico, se concentraría mayor cantidad de agua en el lado opuesto donde se ubica el carril bici. Un fenómeno similar sucede en Parlament con menor incidencia (0.1 puntos menor), cuyo carril bici se sitúa en la parte alta de la pendiente transversal de la calle. Por tanto, la capacidad de interceptar flujo superficial en ambos casos sería ligeramente menor.

## Discusión

Los autores son conscientes de que las hipótesis realizadas para la construcción de los modelos numéricos (lluvia-escorrentía endógena y omisión de la red de drenaje) propician ciertas limitaciones al estudio. Es por ello que los resultados que se presentan a continuación, a pesar de ser cuantitativos, se analizan desde un punto de vista cualitativo. Es decir, se evalúan los potenciales beneficios de implementar SUDS-lineales a gran escala frente a inundaciones de carácter pluvial.

La Figura 4 muestra, para cada una de las zonas de estudio, los hidrogramas a la salida para una precipitación sintética de 10 años de periodo de retorno y 3 horas de duración para cada uno de los escenarios analizados. En negro se muestra la escorrentía superficial para la situación actual (línea de puntos, sin pavimento permeable; línea continua, con pavimento permeable), mientras que en rojo la que se produciría con bajo el escenario de Cambio Climático evaluado. A pesar de emplear precipitación y escorrentía endógena, sin entrada/salida de caudales externos (p.ej. calles adyacentes y/o del intercambio con la red de drenaje), se observa una reducción significativa de la escorrentía superficial cuando se aplica pavimento permeable en los carriles bici. El volumen de agua infiltrado cuando se aplica pavimento permeable como SUDS-lineales en carriles bici es, en general, elevado. Este volumen supondría más del 38% de la escorrentía superficial, llegando incluso a superar el 90% en el caso de la calle Cavallers.

Aunque se trata de resultados potenciales, el volumen de agua que captaría el pavimento permeable debe ser tratado convenientemente. Transportarla a través del propio pavimento permeable, y posteriormente conectarla a la red de drenaje subterránea, se plantea como una solución plausible, aunque se debería estudiar el fenómeno en toda su complejidad (utilizando un modelo numérico global y dual) para evitar eventuales problemas de inundación asociados a fenómenos locales (p.ej. exfiltración por falta de capacidad de infiltración de las capas inferiores).

Los trabajos realizados por Ortiz et al. (2020) demuestran que el 24% de la red generaría sobrevertido en la actualidad para T10, incrementándose hasta el 28% si se consideran los efectos del Cambio Climático. Por lo que introducir el agua infiltrada, ya sea total o parcial, incrementaría potencialmente el estrés al que se ve sometida la red de drenaje subterránea.

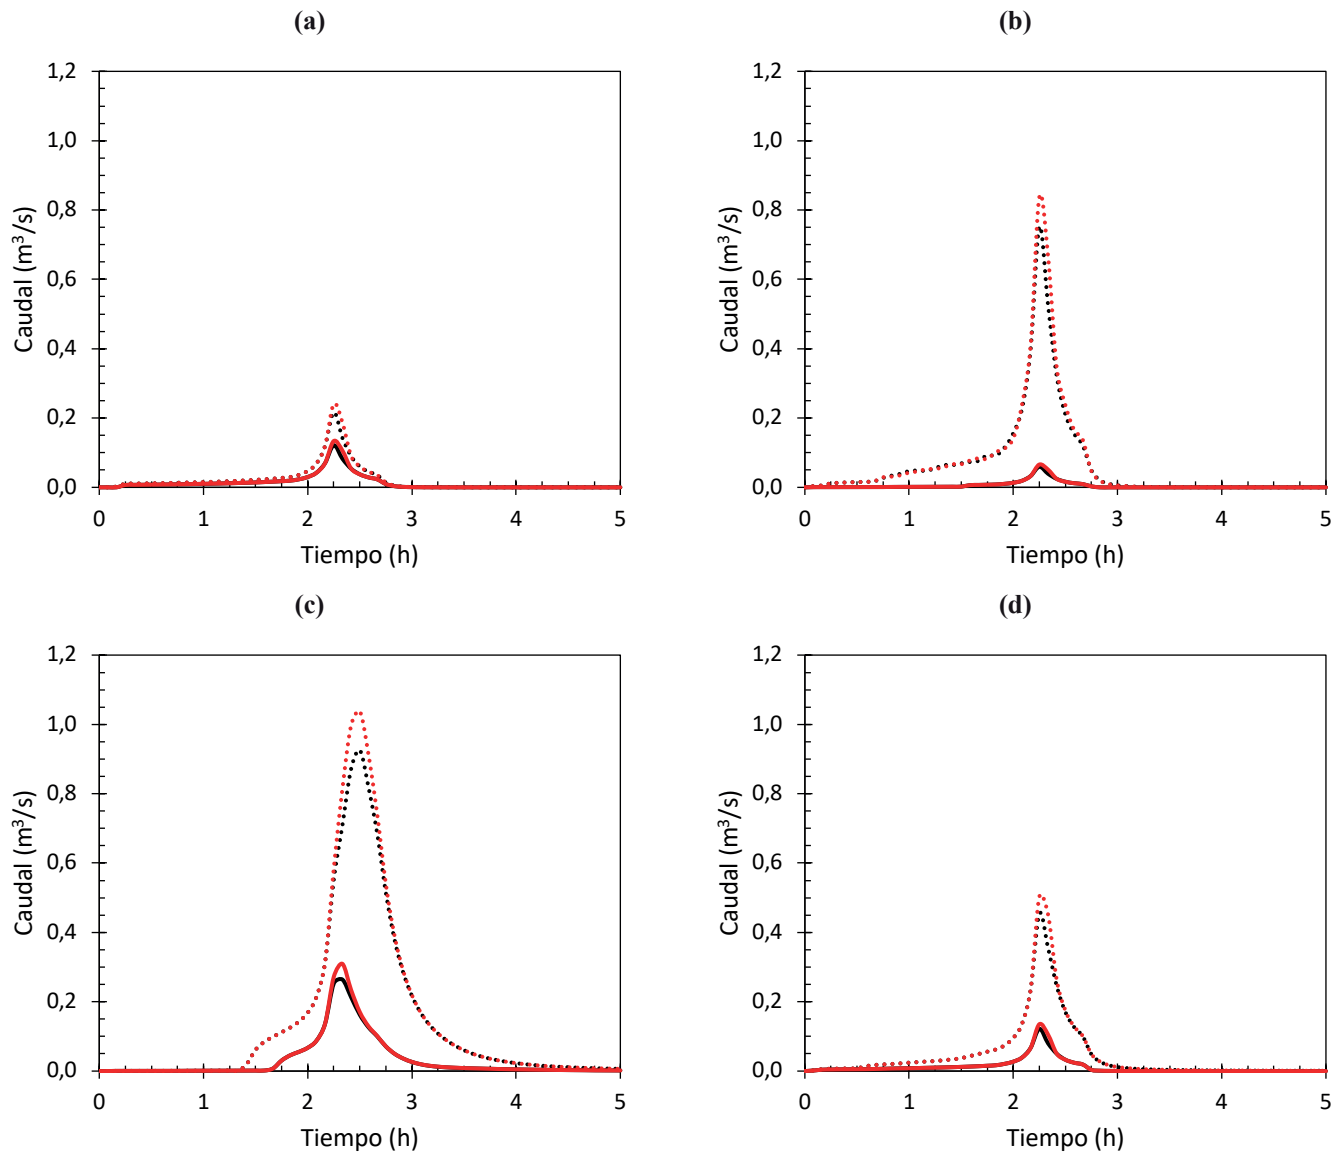

**Figura 4** | Hidrogramas de salida en situación actual (líneas negras) y considerando los efectos de Cambio Climático (líneas rojas), sin considerar pavimento permeable (líneas punteadas) y considerando pavimento permeable (líneas continuas) en los carriles bici: Gran Capità (a), Cavallers (b), Ronda Sant Pau (c) y Parlament (d). Precipitación sintética de 10 años de periodo de retorno y 3 horas de duración.

Bajo esta situación, sería conveniente explorar la capacidad del pavimento permeable no solo como elemento de captación, sino también como elemento de laminación. Al tratarse de un medio poroso, la onda de avenida, al infiltrarse parcial o totalmente por el medio, se propagaría más lentamente. Es decir, el caudal entraría en la red parcialmente laminado y, por tanto, no se solaparía con la punta del hidrograma de la red, incrementando así el volumen de agua transportado durante el evento, incrementando así la eficiencia de todo el sistema de drenaje. Asimismo, cabe destacar que la presencia de pavimento permeable en los laterales de las calzadas podría complementar la utilización de elementos de captación tradicionales, como imbornales, haciendo todo el sistema de drenaje más eficiente ya que se estaría captando agua superficial, de forma regular y constante, a lo largo de toda la calle.

Debido a fenómenos como obstrucción, tráfico de vehículos y decisiones relacionadas con el diseño y el mantenimiento del pavimento, la capacidad de infiltración de un pavimento permeable disminuye con el paso del tiempo, llegando incluso, en los pavimentos de hormigón poroso y mezcla bituminosa porosa, a ser nula después de 10 años de su instalación

(Sañudo-Fontaneda et al., 2018). En este marco, la modelización numérica de estas técnicas, a través de una implementación difusa, deberían tener en cuenta el efecto de la potencial oclusión sobre la capacidad de infiltración en función de la vida útil del pavimento. Para evitar esta situación, debe existir un programa de limpieza, mantenimiento y sustitución periódico con el fin de mantener su eficiencia acorde a los estándares de las condiciones de diseño.

---

## CONCLUSIONES

Los pavimentos permeables, aplicados convenientemente, pueden convertirse en Sistemas de Drenaje Urbano Sostenible (SUDS) eficientes y eficaces para reducir la escorrentía superficial y, por lo tanto, el riesgo por inundación en zonas urbanas. Su actual aplicación, siendo generalmente de carácter puntual (p.ej. jardines, aparcamiento, etc.), puede condicionar, o incluso limitar, los potenciales beneficios en términos de reducción de la peligrosidad de las inundaciones en zona urbana, así como la posible reutilización o gestión de los recursos hídricos captados.

La aplicación de pavimentos permeables en carriles bici puede ser una alternativa razonable en ciudades densamente urbanizadas, convirtiéndose en *SUDS-lineales* que permitirían captar la escorrentía superficial de manera lineal, continua y difusa. La eficacia de este sistema, así como los potenciales beneficios en términos de reducción de la peligrosidad hidráulica asociada a inundaciones pluviales, se ha puesto a prueba en tramos de calle con diferentes características de la ciudad de Barcelona.

Los resultados numéricos muestran reducciones del caudal superficial punta entre el 44 y 92%. La mayor eficacia se observa para calles cuyo carril bici esté orientado perpendicularmente a la dirección principal de drenaje, actuando así como un interceptor. Esta primera aproximación numérica, que considera el proceso de infiltración de agua en pavimentos permeables y sus efectos en la hidrodinámica en superficie, ofrece volúmenes de agua infiltrada superiores al 38% de la escorrentía superficial.

La aplicación de *SUDS-lineales* debe ser abordada de forma global, integrando procesos de infiltración, exfiltración, captación y transporte, así como procesos de oclusión, desgaste, etc. Las líneas de trabajo futuras deben estar orientadas, por tanto, a mejorar el conocimiento sobre el comportamiento del flujo a través de este tipo de material, así como determinar su capacidad de almacenamiento y los beneficios en términos de laminación que producirían en los hidrogramas, tanto a nivel superficial como en la red de alcantarillado. La solución técnica para conectar la capa permeable con el sistema de drenaje subterráneo debe ser, también, analizada y, posteriormente, implementada en herramientas de modelización numérica del flujo dual.

---

## AGRADECIMIENTOS

El presente trabajo se ha realizado en el marco del proyecto "Avaluació de SUDS-lineals per reduir el risc d'inundació amb horitzons de Canvi Climàtic" (20S06841-001), cofinanciado por el programa Subvencions pel Clima del Ajuntament de Barcelona.

---

## REFERENCIAS

- Anta-Álvarez, J., Bermúdez, M., Cea, L., Suárez, J., Ures, P., Puertas, J. 2015. Modelización de los impactos por DSU en el río Miño (Lugo). *Ingeniería del agua*, 19(2), 105. <https://doi.org/10.4995/ia.2015.3648>
- Aranda, J. Á., Beneyto, C., Sánchez-Juny, M., Bladé, E. 2021. Efficient Design of Road Drainage Systems. *Water*, 13(12), 1661. <https://doi.org/10.3390/w13121661>
- Arnbjerg-Nielsen, K. 2012. Quantification of climate change effects on extreme precipitation used for high resolution hydrologic design. *Urban Water Journal*, 9(2), 57–65. <https://doi.org/10.1080/1573062X.2011.630091>

- Bladé, E., Cea, L., Corestein, G., Escolano, E., Puertas, J., Vázquez-Cendón, E., Dolz, J., Coll, A. 2014a. Iber: herramienta de simulación numérica del flujo en ríos. *Revista Internacional de Métodos Numéricos para Cálculo y Diseño en Ingeniería*, 30(1), 1–10. <https://doi.org/10.1016/j.rimni.2012.07.004>
- Bladé, E., Cea, L., Corestein, G. 2014b. Numerical modelling of river inundations. *Ingeniería del agua*, 18(1), 68. <https://doi.org/10.4995/ia.2014.3144>, 2014b.
- Casas-Castillo, M. C., Rodríguez-Solà, R., Navarro, X., Russo, B., Lastra, A., González, P., Redaño, A. 2018. On the consideration of scaling properties of extreme rainfall in Madrid (Spain) for developing a generalized intensity-duration-frequency equation and assessing probable maximum precipitation estimates. *Theoretical and applied climatology*, 131(1), 573–580. <https://doi.org/10.1007/s00704-016-1998-0>
- Casas-Planes, A., Benito, G., Thorndycraft, V. R., Rico, M. 2005. Efectos de las fuentes cartográficas en los resultados de la modelación hidráulica de crecidas. *Ingeniería del agua*, 12(4), 309. <https://doi.org/10.4995/ia.2005.2567>
- Castro-Fresno, D., Andrés-Valeri, V. C., Sañudo-Fontaneda, L. A., Rodríguez-Hernandez, J. 2013. Sustainable Drainage Practices in Spain, Specially Focused on Pervious Pavements. *Water*, 5(1). <https://doi.org/10.3390/w5010067>
- Cea, L., Bladé, E. 2015. A simple and efficient unstructured finite volume scheme for solving the shallow water equations in overland flow applications. *Water resources research*, 51(7), 5464–5486. <https://doi.org/10.1002/2014WR016547>
- Cheng, Y.-Y., Lo, S.-L., Ho, C.-C., Lin, J.-Y., Yu, S. L. 2019. Field Testing of Porous Pavement Performance on Runoff and Temperature Control in Taipei City. *Water*, 11(12), 2635. <https://doi.org/10.3390/w11122635>
- Christensen, O. B., Christensen, J. H. 2004. Intensification of extreme European summer precipitation in a warmer climate. *Global and Planetary Change*, 44(1), 107–117. <https://doi.org/10.1016/j.gloplacha.2004.06.013>
- Craig, T, Zheng, L. 2022. Pervious Concrete Bicycle Lanes? Roadway Stormwater Mitigation within the Right-of-Way. In *Low Impact Development for Urban Ecosystem and Habitat Protection*, 1–7. [https://doi.org/10.1061/41009\(333\)23](https://doi.org/10.1061/41009(333)23)
- Dai, Y., Jiang, J., Gu, X., Zhao, Y, Ni, F. 2020. Sustainable Urban Street Comprising Permeable Pavement and Bioretention Facilities: A Practice. *Sustainability*, 12, 8288. <https://doi.org/10.3390/su12198288>
- de la Fuente, L., Perales, S., Rico, M., Andrés, I, Marco, J. B. 2021. *Guía Básica para el Diseño de Sistemas Urbanos de Drenaje Sostenible en la Ciudad de València*. Cicle Integral de l'Aigua. Ajuntament de València.
- Del Val-Melús, M. A. 1990. Perspectivas de futuro de los firmes drenantes. *Seminario sobre Mezclas Bituminosas Drenantes*, 57–64.
- Fraga, I., Cea, L, Puertas, J. 2013. Experimental study of the water depth and rainfall intensity effects on the bed roughness coefficient used in distributed urban drainage models. *Journal of Hydrology*, 505, 266–275. <https://doi.org/10.1016/j.jhydrol.2013.10.005>
- Fraga, I., Cea, L, Puertas, J. 2020. MERLIN: a flood hazard forecasting system for coastal river reaches, *Natural Hazards*, 100(3), 1171–1193. <https://doi.org/10.1007/s11069-020-03855-7>
- Fraga, I., Cea, L., Puertas, J., Mosqueira, G., Quinteiro, B., Botana, S., Fernández, L., Salsón, S., Fernández-García, G, Taboada, J. 2021. MERLIN: Una nueva herramienta para la predicción del riesgo de inundaciones en la demarcación hidrográfica Galicia-Costa. *Ingeniería del agua*, 25(3), 215. <https://doi.org/10.4995/ia.2021.15565>
- Gordillo, J. 2001. Panorama general de las mezclas bituminosas, *Jornadas sobre caracterización y control de calidad de mezclas bituminosas*, Sevilla.
- ICGC. 2020. Descàrregues, *Institut Cartogràfic i Geològic de Catalunya*, 2020.
- IPCC (Intergovernmental Panel on Climate Change). 2014. Technical Summary. In *Climate Change 2013 – The Physical Science Basis: Working Group I Contribution to the Fifth Assessment Report of the Intergovernmental Panel on Climate Change* (pp. 31–116). Cambridge: Cambridge University Press. <https://doi.org/10.1017/CBO9781107415324.005>

- IPCC (Intergovernmental Panel on Climate Change). 2021. *The Physical Science Basis. Contribution Work. Group I to Sixth Assessment Report. Intergovernmental Panel of Climate Change*, In Press [online] Disponible en: <https://www.ipcc.ch/report/ar6/wg1> [Acceso: Marzo 2022].
- Jato-Espino, D., Sañudo-Fontaneda, L. A., Andrés-Valeri, V. C. 2019. Green Infrastructure: Cost-Effective Nature-Based Solutions for Safeguarding the Environment and Protecting Human Health and Well-Being. *Handbook of environmental materials management*, 1525–1550. [https://doi.org/10.1007/978-3-319-73645-7\\_46](https://doi.org/10.1007/978-3-319-73645-7_46)
- Jiménez, A., Russo, B., Ruiz, O., Acero, A. 2021. Eficiencia hidráulica y ambiental de cubiertas verdes en un clima mediterráneo continental seco. Aplicación a una nueva urbanización en la ciudad de Zaragoza (España). *Ingeniería del agua*, 25(2), 127–144. <https://doi.org/10.4995/ia.2021.14112>
- Lastra, A., González, P., Russo, B., Xipell, A. R., Batalla, J. R. 2015. Efectos del cambio climático sobre las precipitaciones extremas en la comunidad de Madrid. In *XXXIII Jornadas Técnicas de AEAS*, p. 17, Asociación Española de Abastecimientos de Agua y Saneamiento.
- Lehner, B., Döll, P., Alcamo, J., Henrichs, T., Kaspar, F. 2006. Estimating the Impact of Global Change on Flood and Drought Risks in Europe: a continental, integrated analysis. *Climatic Change*, 75(3), 273–299. <https://doi.org/10.1007/s10584-006-6338-4>
- Llasat, M. C., Rodríguez, R. 1992. Extreme rainfall events in Catalonia. The case of 12 November 1988. *Natural Hazards*, 5(2), 133–151. <https://doi.org/10.1007/BF00127002>
- Locatelli, L., Guerrero, M., Russo, B., Martínez-Gomariz, E., Sunyer, D., Martínez, M. 2020. Socio-economic assessment of green infrastructure for climate change adaptation in the context of urban drainage planning. *Sustainability*, 12(9). <https://doi.org/10.3390/su12093792>
- Martín-Vide, J. 1994. Geographical Factors in the Pluviometry of Mediterranean Spain: Drought and Torrential Rainfall. In *U.S.-Spain Workshop on Natural Hazards*, pp. 9–25, The University of Iowa, Iowa Institute of Hydraulic Research.
- Ministerio de Agricultura, Alimentación y Medio Ambiente (Fundación Biodiversidad, Oficina Española de Cambio Climático, Agencia Estatal de Meteorología, Centro Nacional de Educación Ambiental). 2016. Cambio Climático: *Informe de síntesis, guía resumida del quinto informe de evaluación del IPCC*, 52.
- Nnadi, E. O., Coupe, S. J., Sañudo-Fontaneda, L. A., Rodriguez-Hernandez, J. 2014. An evaluation of enhanced geotextile layer in permeable pavement to improve stormwater infiltration and attenuation. *International Journal of Pavement Engineering*, 15(10), 925–932. <https://doi.org/10.1080/10298436.2014.893325>
- Núñez-Collado, A., Salgado-Cámara, A., Martín-Anta, D., Prieto-Leache, I., Montoya-Rodríguez, J., Ferreiro-Gómez, P., Soler, G. V. 2019. *Guías de adaptación al riesgo de inundación: Sistemas Urbanos de Drenaje Sostenible*. Ministerio para la transición ecológica, 1–96.
- Ortiz, A., Velasco, M. J., Esbri, O., Medina, V., Russo, B. 2020. The Economic Impact of Climate Change on Urban Drainage Master Planning in Barcelona. *Sustainability*, 13(1), 71. <https://doi.org/10.3390/su13010071>
- Pérez, F. F., Boscolo, R., Bladé, I., Cacho, I., Castro-Díez, Y., Gomis, D., González-Sampérez, P., Miguez-Macho, G., Rodríguez-Fonseca, B., Rodríguez-Puebla, C., Sánchez, E., Sotillo, M. G., Valero-Garcés, B. L., Vargas-Yáñez, M. 2010. *Clima en España: pasado, presente y futuro*. Informe de Evaluación del Cambio Climático Regional..
- Redaño, A., Lorente, J., Vazquez, R. 1986. Climatología de las intensidades extremas de lluvia en Barcelona. *Rev Geofísic*, 42, 193–198.
- Rodríguez, R., Navarro, X., Casas, M. C., Ribalaygua, J., Russo, B., Pouget, L., Redaño, A. 2014. Influence of climate change on IDF curves for the metropolitan area of Barcelona (Spain). *International Journal of Climatology*, 34(3), 643–654. <https://doi.org/https://doi.org/10.1002/joc.3712>

- Russo, B., Sunyer, D., Locatelli, L., Martínez, E., Almeida, M. C., David, L. M., Telhado, M., Morais, M., Duarte, N., Lopes, R. 2019. Multi-hazards assessment related to water cycle extreme events for future scenarios (Business As Usual). *Deliverable. 2.3 RESCCUE Project*.
- Sañudo-Fontaneda, L. A., Andres-Valeri, V. C., Costales-Campa, C., Cabezón-Jiménez, I, Cadenas-Fernández, F. 2018. The long-term hydrological performance of Permeable Pavement Systems in Northern Spain: An approach to the "end-of-life" concept. *Water*, 10(4). <https://doi.org/10.3390/w10040497>
- Sañudo, E., Cea, L, Puertas, J. 2020. Modelling Pluvial Flooding in Urban Areas Coupling the Models Iber and SWMM. *Water*, 12(9), 2647. <https://doi.org/10.3390/w12092647>
- Sanz-Ramos, M., Amengual, A., Bladé, E., Romero, R, Roux, H. 2018. Flood forecasting using a coupled hydrological and hydraulic model (based on FVM) and high resolution meteorological model, edited by A. Paquier and N. Rivière. In *E3S Web Conference*, 40(06028). <https://doi.org/10.1051/e3sconf/20184006028>
- Sanz-Ramos, M., Martí-Cardona, B., Bladé, E., Seco, I., Amengual, A., Roux, H, Romero, R. 2020a. NRCS-CN Estimation from Onsite and Remote Sensing Data for Management of a Reservoir in the Eastern Pyrenees. *Journal of Hydrologic Engineering*, 25(9), 05020022. [https://doi.org/10.1061/\(ASCE\)HE.1943-5584.0001979](https://doi.org/10.1061/(ASCE)HE.1943-5584.0001979)
- Sanz-Ramos, M., Bladé, E, Escolano, E. 2020b. Optimización del cálculo de la Vía de Intenso Desagüe con criterios hidráulicos. *Ingeniería del agua*, 24(3), 203. <https://doi.org/10.4995/ia.2020.13364>
- Sanz-Ramos, M., Tellez Alvarez, J. D., Bladé, E, Gómez-Valentín, M. 2020c. Simulating the Hydrodynamics of Sewer-Inlets Using a 2D-SWE Based Model, in *Advances in Hydroinformatics. SimHydro 2019 - Models for Extreme Situations and Crisis Management*, pp. 821–838, Springer Water. Springer, Singapore., 2020c. [https://doi.org/10.1007/978-981-15-5436-0\\_64](https://doi.org/10.1007/978-981-15-5436-0_64)
- Sanz-Ramos, M., Bladé, E., González-Escalona, F., Olivares, G, Aragón-Hernández, J. L. 2021. Interpreting the Manning Roughness Coefficient in Overland Flow Simulations with Coupled Hydrological-Hydraulic Distributed Models. *Water*, 13(23), 3433. <https://doi.org/10.3390/w13233433>
- Sanz-Ramos, M., Olivares, G, Bladé, E. 2022. Experimental characterization and two-dimensional hydraulic-hydrologic modelling of the infiltration process through permeable pavements. *Revista Internacional de Métodos Numéricos para Cálculo y Diseño en Ingeniería*, 38(1). <https://doi.org/10.23967/j.rimni.2022.03.012>
- Vázquez, R., Redaño, A, Lorente, J. 1987. CurvasIDF. Barcelona-Fabra. *Revista de Obras Públicas. Febrero*, 91–102.
- West, D., Kaye, N. B, Putman, B. J. 2016. Surface Flow and Spread Calculations for the Preliminary Design of Porous Pavement Bike Lanes. *Journal of Irrigation and Drainage Engineering*, 142(2), 4015046. [https://doi.org/10.1061/\(ASCE\)IR.1943-4774.0000964](https://doi.org/10.1061/(ASCE)IR.1943-4774.0000964)
- Willems, P., Arnbjerg-Nielsen, K., Olsson, J., Nguyen, V. T. V. (2012). Climate change impact assessment on urban rainfall extremes and urban drainage: Methods and shortcomings. *Atmospheric Research*, 103, 106–118. <https://doi.org/https://doi.org/10.1016/j.atmosres.2011.04.003>
